# Supplementary material for: A dual role for K63-linked ubiquitin chains in multivesicular body biogenesis and cargo sorting
Source: PubMed Central journal article supplement — Mol Biol Cell. 2012 Jun 1;23(11):2170–83. doi: 10.1091/mbc.E11-10-0891 (PMC3364180; doi:10.1091/mbc.e11-10-0891), 2012-06-01
Supplement: supp_E11-10-0891_CombinedSupMats.pdf [file supp_E11-10-0891_CombinedSupMats.pdf]

### ***Supplementary Materials and Methods***

***Yeast strains and growth conditions.*** Supplementary Table 1 shows the additional yeast strains used for Supplementary Figures.

***Plasmid construction.*** Plasmids pRS246-Ub (*CUP1*, 2 $\mu$ , *URA3*) and m886 (*ADHI*, RGS-His<sub>8</sub>-Ub, *LEU2*) were used in Supplementary Figure 2A and 4A, respectively.

### Supplementary figure legends

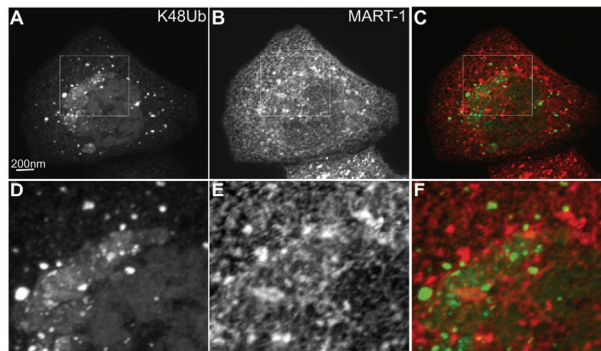

**Supplementary Figure 1**

**Figure S1. The anti-K48Ub antibody does not label MART-1 positive endosomes.** HeLa cells transfected with MART-1 were analyzed by IF microscopy with antibodies against MART-1 (B, E) and K48Ub chains (A, D). Overlays are shown in (C) and (F). (D), (E) and (F) correspond to a 1.8 X magnification of the boxed areas in (A), (B) and (C), respectively.

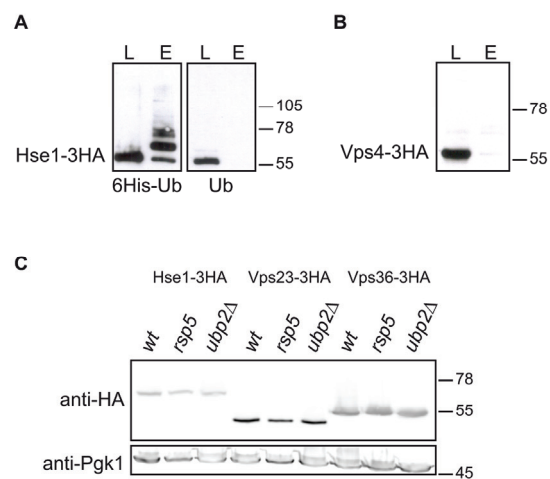

**Supplementary Figure 2**

**Figure S2. ESCRT ubiquitylation is UBD-dependent.** (A) Total protein extracts prepared from cells producing chromosome-encoded Hse1-3xHA and overproducing 6His-Ub or untagged Ub were subjected to nickel-column purification. Lysates (L) and eluates (E) were analyzed by SDS-PAGE followed by immunoblotting with anti-HA antibody. Ubiquitylated forms of Hse1-3HA are detected in the eluate of cells producing 6His-Ub, but are absent from the eluate of cells producing untagged Ub. (B) The same experiment as in (A) was performed for wt cells expressing endogenous Vps4-3xHA and overproducing 6His-Ub. No ubiquitylated form of Vps4-3xHA could be detected in the nickel column eluate. (C) **ESCRT ubiquitylation does not regulate protein steady-state levels.** Total protein extracts of wt, *rsp5* or *ubp2Δ* cells producing Hse1-3xHA, Vps23-3xHA or Vps36-3xHA were subjected to SDS-PAGE followed by immunoblotting with an anti-HA antibody. The anti-Pgk1 blot serves as a loading control.

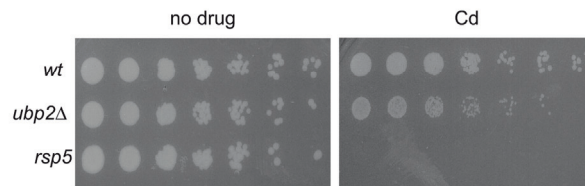

**Supplementary Figure 3**

**Figure S3. *ubp2Δ* cells display cadmium sensitivity.** Serial dilutions of liquid cultures of 23344c (wt), 27038b (*npi1/rsp5*) and VA029 (*ubp2Δ*) cells were grown on solid YNB medium plus 2% glucose supplemented with uracil, in the presence or absence of 10  $\mu$ M cadmium.

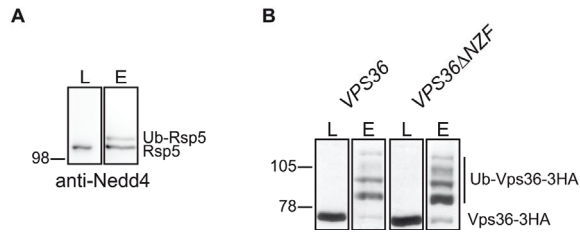

**Supplementary Figure 4**

**Figure S4. (A) The E3 ligase Rsp5 is ubiquitylated.** Total protein extracts prepared from wt cells producing RGS-His<sub>8</sub>-Ub under the control of the *ADHI* promoter were subjected to nickel column purification. Lysate (L) and eluate (E) were immunoblotted with an anti-Nedd4 antibody known to recognize Rsp5. The arrow indicates the monoubiquitylated form of Rsp5, which was abundant in the eluate. **(B) Vps36<sup>ANZF</sup> is not affected in its ubiquitylation.** We attempted to test one aspect of the coupled ubiquitylation hypothesis with Vps36, using a mutant that abrogates its interaction *in vitro* with Ub without affecting cargo MVB sorting *in vivo* (Shields et al., 2009). Total protein extracts prepared from wt cells expressing Vps36-3xHA and Vps36<sup>ANZF</sup>-3xHA and overproducing 6His-Ub were subjected to Nickel column purification. Lysates (L) and eluates (E) were analyzed with an anti-HA antibody. The ubiquitylation pattern of Vps36 is not altered when the Ub-binding properties of the NZF domain are inhibited. Hence, either Vps36 ubiquitylation does not follow the coupled-ubiquitylation mechanism, or Vps36<sup>ANZF</sup> still binds Ub *in vivo*.

*Field Code Changed*

**Supplementary Table 1. The *S. cerevisiae* strains used**

| <b>Strain</b>                          | <b>Genotype</b>                                                                                                              | <b>Source</b>     |
|----------------------------------------|------------------------------------------------------------------------------------------------------------------------------|-------------------|
| RHT517<br>(VPS4-3xHA)                  | <i>Mata his3Δ1 leu2Δ0 met15Δ0 ura3Δ0 VPS4-3xHA::HIS3MX6</i>                                                                  | <i>This study</i> |
| RHT518 (VPS36-3xHA)                    | <i>MATa leu2-3,112 ura3-52 his3-Δ200 trp1-Δ901 lys2-801 suc2-Δ9 mel VPS36::TRP1::vps36Δ:HIS3::3xHA-KanMX4</i>                | <i>This study</i> |
| RHT519<br>(VPS36 <sup>ANZF</sup> 3xHA) | <i>MATa leu2-3,112 ura3-52 his3-Δ200 trp1-Δ901 lys2-801 suc2-Δ9 mel VPS36<sup>ANZF</sup>::TRP1::vps36Δ:HIS3::3xHA-KanMX4</i> | <i>This study</i> |
